# Supplementary material for: Patterns of π-electron delocalization in aromatic and antiaromatic organic compounds in the light of Hückel's 4n + 2 rule
Source: Royal Society of Chemistry journal article supplement (doi:10.1039/b924972a), 2010-01-01
Supplement: b924972a.pdf [file b924972a.pdf]

## Supporting Information

# Patterns of $\pi$ -electron delocalization in aromatic and antiaromatic organic compounds in the light of the Hückel's $4n+2$ rule

Ferran Feixas,<sup>§</sup> Eduard Matito,<sup>‡</sup> Miquel Solà<sup>\*,§</sup> and Jordi Poater<sup>\*,§</sup>

*Institut de Química Computacional and Departament de Química, Campus de Montilivi, 17071 Girona, Catalonia, Spain, and Institute of Physics, University of Szczecin, 70-451 Szczecin, Poland*

### Contents

- Section S1.** Values of  $\delta_{\pi}^{1,x}$  (in electrons), MCI, and FLU for N, N-2, and N+2 species calculated using three different schemes: (a) full geometry and MO relaxation of all N, N - 2, and N + 2 species (OPT); (b) geometry optimization only for N species; N - 2 and N + 2 keep the geometry of N, but the MOs are fully relaxed (GEO); and (c) geometry optimization only for N species; N - 2 and N + 2 keep the geometry and the MOs of the N system, and thus, the wave function of N species is used throughout the calculations (ONLY). Figures show how the  $\delta_{\pi}^{1,x}$  and MCI are hardly affected by the geometry and electron relaxation. p. S2
- Section S2.** Evolution of  $\delta_{\pi}^{1,x}$  (in electrons), MCI, FLU, and HOMA along the out-of-plane boat-like distortion of C<sub>6</sub>H<sub>6</sub> and C<sub>8</sub>H<sub>8</sub>. Figures show how the average crossed terms ( $\delta_{\pi}^{1,x}$ ), MCI, FLU and HOMA are hardly affected by the out-of-plane distortion. p. S6
- Figure S3.** Evolution of  $\delta_{\pi}^{1,x}$  (in electrons) in N, N-2, and N+2 species for a) C<sub>4</sub>H<sub>4</sub>, b) C<sub>6</sub>H<sub>6</sub>, c) C<sub>8</sub>H<sub>8</sub>, d) C<sub>14</sub>H<sub>14</sub>, and e) C<sub>16</sub>H<sub>16</sub>. p. S8
- Figure S4.** Evolution of  $\delta_{\pi}^{1,x}$  (in electrons) in N and N-2 species for a) C<sub>10</sub>H<sub>10</sub>, b) C<sub>12</sub>H<sub>12</sub>, c) C<sub>11</sub>H<sub>11</sub><sup>+</sup>, d) C<sub>11</sub>H<sub>11</sub><sup>-</sup>, e) C<sub>13</sub>H<sub>13</sub><sup>+</sup>, f) C<sub>13</sub>H<sub>13</sub><sup>-</sup>, and g) C<sub>15</sub>H<sub>15</sub><sup>+</sup>. p. S11
- Table S5.**  $\delta_{\pi}^{1,x}$  (in electrons), MCI, FLU, HOMA, NICS(0), NICS(1), NICS(0)<sub>zz</sub>, and NICS(1)<sub>zz</sub> results for the rings studied at the lowest-lying singlet and triplet states for a) C<sub>6</sub>H<sub>5</sub>N, b) pyridazine, c) pyrimidine, d) triazine, and e) C<sub>7</sub>H<sub>7</sub><sup>+</sup>. Figures show the evolution of  $\delta_{\pi}^{1,x}$  (in electrons) in N(s) and N(t) species. p. S14
- Table S6.**  $\delta_{\pi}^{1,x}$  (in electrons), MCI, FLU, HOMA, NICS(0), NICS(1), NICS(0)<sub>zz</sub>, and NICS(1)<sub>zz</sub> results for the rings studied at the lowest-lying singlet and triplet states for a) C<sub>4</sub>H<sub>4</sub>, b) C<sub>5</sub>H<sub>5</sub><sup>-</sup>, c) C<sub>5</sub>H<sub>4</sub>NH, d) C<sub>5</sub>H<sub>4</sub>O, e) C<sub>5</sub>H<sub>4</sub>S<sup>+</sup>, f) C<sub>5</sub>H<sub>4</sub>P<sup>+</sup>, g) C<sub>5</sub>H<sub>4</sub>BH, h) C<sub>5</sub>H<sub>4</sub>SiH<sup>+</sup>, and i) C<sub>5</sub>H<sub>4</sub>F<sub>2</sub>. Figures show the evolution of  $\delta_{\pi}^{1,x}$  (in electrons) in N(s) and N(t) species. p. S17
- Table S7.** MCI, FLU, HOMA, NICS(0), NICS(1), NICS(0)<sub>zz</sub>, and NICS(1)<sub>zz</sub> results for the rings studied. A and B refer to the rings (see Schemes 2 and 3). p. S22

**Section S1.** Values of  $\delta_{\pi}^{1,x}$  (in electrons), MCI, and FLU for N, N-2, and N+2 species calculated using three different schemes: (a) full geometry and MO relaxation of all N, N - 2, and N + 2 species (OPT); (b) geometry optimization only for N species; N - 2 and N + 2 keep the geometry of N, but the MOs are fully relaxed (GEO); and (c) geometry optimization only for N species; N - 2 and N + 2 keep the geometry and the MOs of the N system, and thus, the wave function of N species is used throughout the calculations (ONLY). Figures show how the  $\delta_{\pi}^{1,x}$  and MCI are hardly affected by the geometry and electron relaxation.

a) C<sub>6</sub>H<sub>6</sub>

|      | C <sub>6</sub> H <sub>6</sub> | N-2    | N     | N+2   |
|------|-------------------------------|--------|-------|-------|
| OPT  | $\delta_{\pi}^{1,2}$          | 0.289  | 0.425 | 0.387 |
| GEO  | $\delta_{\pi}^{1,2}$          | 0.291  | 0.425 | 0.385 |
| ONLY | $\delta_{\pi}^{1,2}$          | 0.288  | 0.427 | 0.385 |
| OPT  | $\delta_{\pi}^{1,3}$          | 0.097  | 0.036 | 0.083 |
| GEO  | $\delta_{\pi}^{1,3}$          | 0.100  | 0.036 | 0.082 |
| ONLY | $\delta_{\pi}^{1,3}$          | 0.087  | 0.037 | 0.083 |
| OPT  | $\delta_{\pi}^{1,4}$          | 0.066  | 0.094 | 0.052 |
| GEO  | $\delta_{\pi}^{1,4}$          | 0.058  | 0.094 | 0.052 |
| ONLY | $\delta_{\pi}^{1,4}$          | 0.059  | 0.094 | 0.051 |
| OPT  | MCI                           | -0.020 | 0.073 | 0.002 |
| GEO  | MCI                           | -0.020 | 0.073 | 0.002 |
| ONLY | MCI                           | -0.012 | 0.073 | 0.003 |

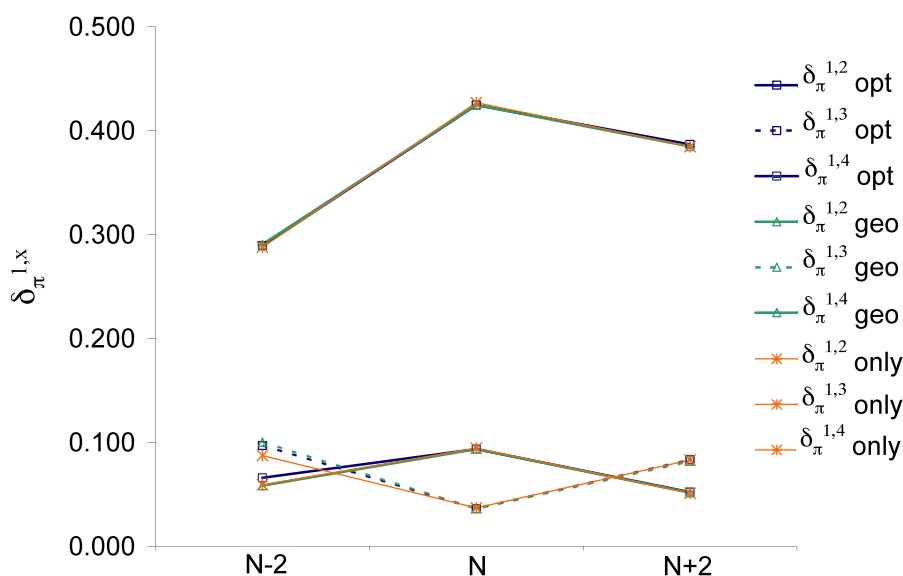

b) C<sub>8</sub>H<sub>8</sub>

|      | C <sub>8</sub> H <sub>8</sub> | N-2   | N      | N+2   |
|------|-------------------------------|-------|--------|-------|
| OPT  | $\delta_{\pi}^{1,2}$          | 0.344 | 0.430  | 0.409 |
| GEO  | $\delta_{\pi}^{1,2}$          | 0.342 | 0.430  | 0.408 |
| ONLY | $\delta_{\pi}^{1,2}$          | 0.338 | 0.432  | 0.414 |
| OPT  | $\delta_{\pi}^{1,3}$          | 0.074 | 0.029  | 0.060 |
| GEO  | $\delta_{\pi}^{1,3}$          | 0.074 | 0.029  | 0.059 |
| ONLY | $\delta_{\pi}^{1,3}$          | 0.074 | 0.029  | 0.061 |
| OPT  | $\delta_{\pi}^{1,4}$          | 0.016 | 0.040  | 0.023 |
| GEO  | $\delta_{\pi}^{1,4}$          | 0.018 | 0.040  | 0.024 |
| ONLY | $\delta_{\pi}^{1,4}$          | 0.018 | 0.040  | 0.025 |
| OPT  | $\delta_{\pi}^{1,5}$          | 0.054 | 0.007  | 0.041 |
| GEO  | $\delta_{\pi}^{1,5}$          | 0.055 | 0.007  | 0.041 |
| ONLY | $\delta_{\pi}^{1,5}$          | 0.054 | 0.007  | 0.044 |
| OPT  | MCI                           | 0.040 | -0.001 | 0.014 |
| GEO  | MCI                           | 0.040 | -0.001 | 0.014 |
| ONLY | MCI                           | 0.038 | -0.001 | 0.015 |

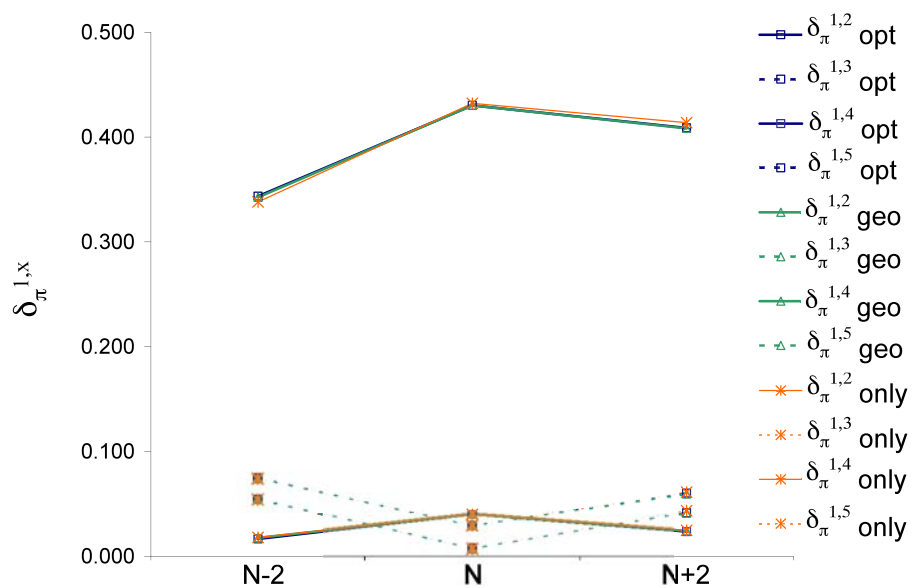

c) C<sub>4</sub>H<sub>4</sub>

|      | C <sub>4</sub> H <sub>4</sub> | N-2   | N     | N+2   |
|------|-------------------------------|-------|-------|-------|
| OPT  | $\delta_{\pi}^{1,2}$          | 0.245 | 0.472 | 0.368 |
| GEO  | $\delta_{\pi}^{1,2}$          | 0.245 | 0.472 | 0.373 |
| ONLY | $\delta_{\pi}^{1,2}$          | 0.243 | 0.477 | 0.375 |
| OPT  | $\delta_{\pi}^{1,3}$          | 0.245 | 0.057 | 0.219 |
| GEO  | $\delta_{\pi}^{1,3}$          | 0.245 | 0.057 | 0.216 |
| ONLY | $\delta_{\pi}^{1,3}$          | 0.243 | 0.059 | 0.233 |
| OPT  | MCI                           | 0.183 | 0.009 | 0.064 |
| GEO  | MCI                           | 0.183 | 0.009 | 0.064 |
| ONLY | MCI                           | 0.181 | 0.009 | 0.071 |

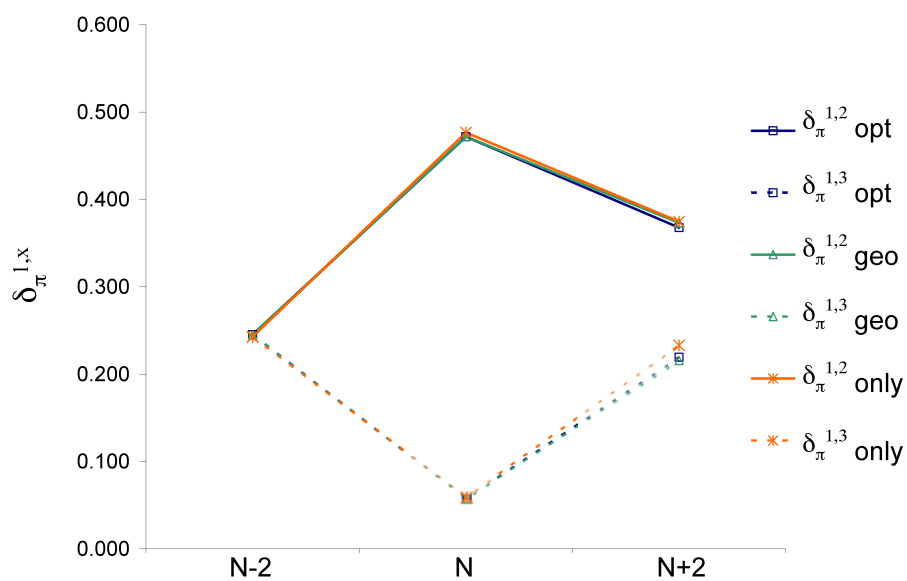

d)  $C_5H_5^-$

|      | $C_5H_5^-$         | N-2    | N     | N+2   |
|------|--------------------|--------|-------|-------|
| OPT  | $\delta_\pi^{1,2}$ | 0.349  | 0.431 | 0.327 |
| GEO  | $\delta_\pi^{1,2}$ | 0.346  | 0.431 | 0.341 |
| ONLY | $\delta_\pi^{1,2}$ | 0.337  | 0.436 | 0.338 |
| OPT  | $\delta_\pi^{1,3}$ | 0.100  | 0.084 | 0.095 |
| GEO  | $\delta_\pi^{1,3}$ | 0.111  | 0.084 | 0.091 |
| ONLY | $\delta_\pi^{1,3}$ | 0.104  | 0.085 | 0.091 |
| OPT  | MCI                | -0.021 | 0.072 | 0.009 |
| GEO  | MCI                | -0.028 | 0.072 | 0.010 |
| ONLY | MCI                | -0.022 | 0.072 | 0.005 |

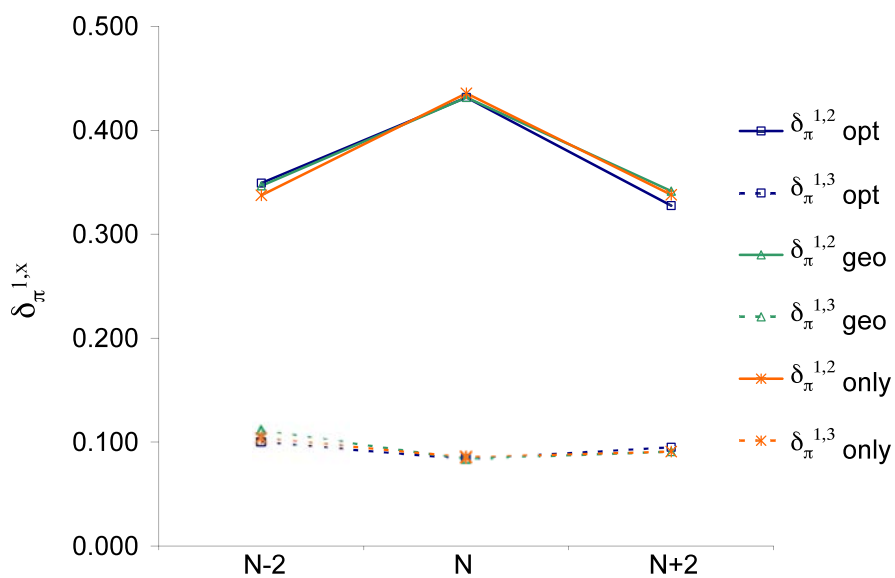

**Section S2.** Evolution of  $\delta_{\pi}^{1,x}$  (in electrons), MCI, FLU, and HOMA along the out-of-plane boat-like distortion of  $C_6H_6$  and  $C_8H_8$ . Figures show how the average crossed terms ( $\delta_{\pi}^{1,x}$ ), MCI, FLU, and HOMA are hardly affected by the out-of-plane distortion.

a)  $C_6H_6$

| $C_6H_6$                                                                          | $\alpha$             | 0°     | 5°     | 10°    | 15°    | 20°    | 25°    |
|-----------------------------------------------------------------------------------|----------------------|--------|--------|--------|--------|--------|--------|
| 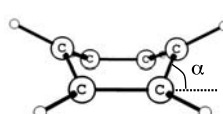 | $\delta_{\pi}^{1,2}$ | 1.390  | 1.390  | 1.389  | 1.388  | 1.387  | 1.386  |
|                                                                                   | $\delta_{\pi}^{1,3}$ | 0.073  | 0.073  | 0.074  | 0.074  | 0.075  | 0.076  |
|                                                                                   | $\delta_{\pi}^{1,4}$ | 0.103  | 0.103  | 0.104  | 0.104  | 0.105  | 0.106  |
|                                                                                   | FLU                  | 0.000  | 0.000  | 0.000  | 0.000  | 0.000  | 0.000  |
|                                                                                   | MCI                  | 0.0726 | 0.0725 | 0.0721 | 0.0715 | 0.0706 | 0.0696 |
|                                                                                   | HOMA                 | 0.99   | 0.99   | 0.99   | 0.99   | 0.98   | 0.97   |

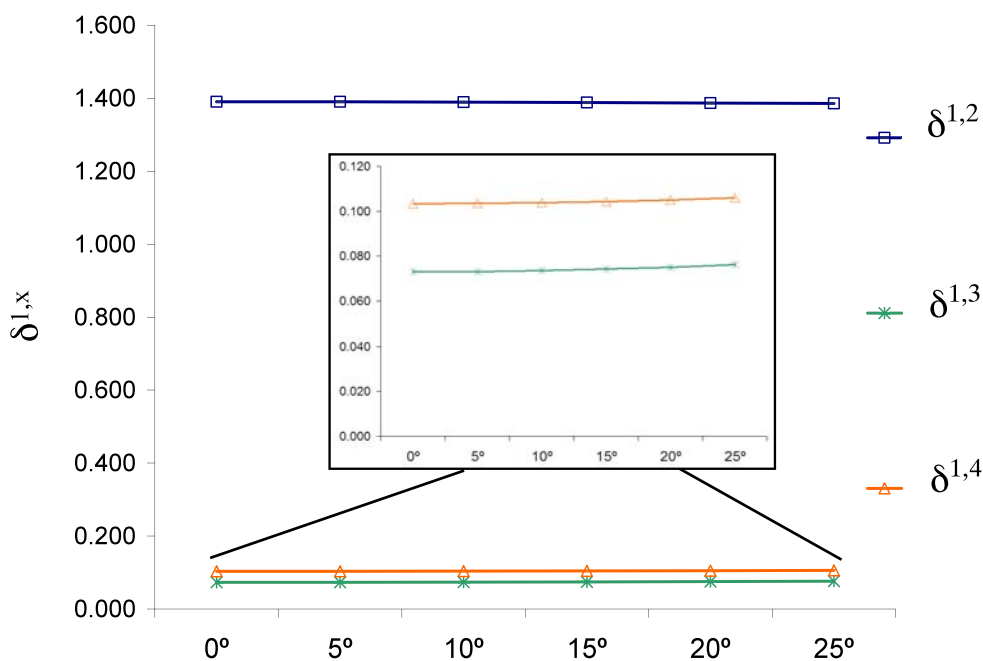

b) C<sub>8</sub>H<sub>8</sub>

| C <sub>8</sub> H <sub>8</sub>                                                     | $\alpha$             | 0°      | 5°      | 10°    | 15°    | 20°    | 25°    | COT   |
|-----------------------------------------------------------------------------------|----------------------|---------|---------|--------|--------|--------|--------|-------|
| 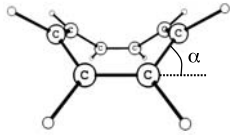 | $\delta_{\pi}^{1,2}$ | 1.401   | 1.401   | 1.402  | 1.402  | 1.403  | 1.404  | 1.404 |
|                                                                                   | $\delta_{\pi}^{1,3}$ | 0.064   | 0.064   | 0.064  | 0.065  | 0.065  | 0.066  | 0.068 |
|                                                                                   | $\delta_{\pi}^{1,4}$ | 0.043   | 0.043   | 0.042  | 0.041  | 0.040  | 0.039  | 0.038 |
|                                                                                   | $\delta_{\pi}^{1,5}$ | 0.008   | 0.008   | 0.008  | 0.009  | 0.009  | 0.010  | 0.014 |
|                                                                                   | FLU                  | 0.105   | 0.105   | 0.106  | 0.106  | 0.107  | 0.109  | 0.115 |
| MCI                                                                               | -0.0005              | -0.0005 | -0.0003 | 0.0000 | 0.0002 | 0.0005 | 0.0009 |       |
| HOMA                                                                              | -0.25                | -0.24   | -0.23   | -0.22  | -0.20  | -0.20  | -0.20  |       |

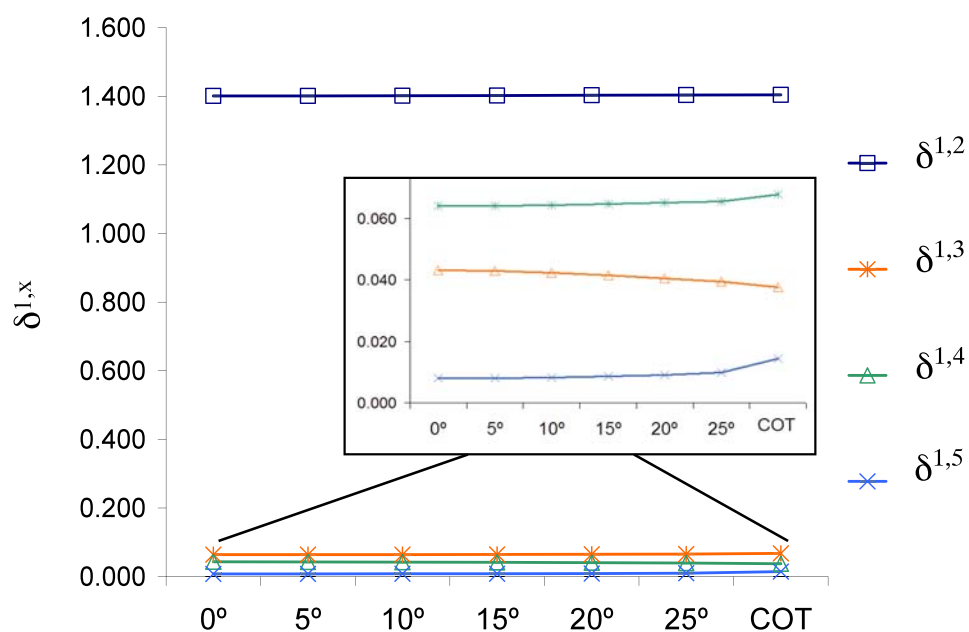

**Figure S3.** Evolution of  $\delta_{\pi}^{1,x}$  (in electrons) in N, N-2, and N+2 species for a)  $C_4H_4$ , b)  $C_6H_6$ , c)  $C_8H_8$ , d)  $C_{14}H_{14}$ , and e)  $C_{16}H_{16}$ .

a)

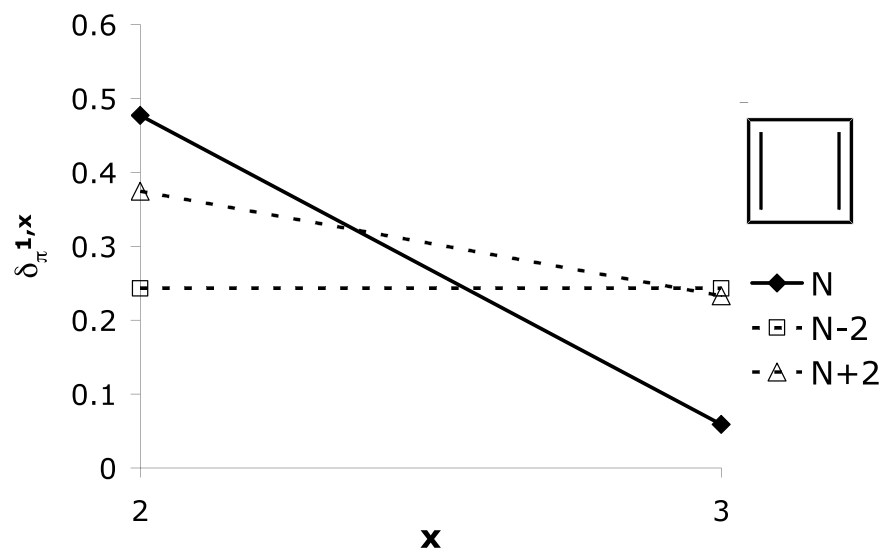

b)

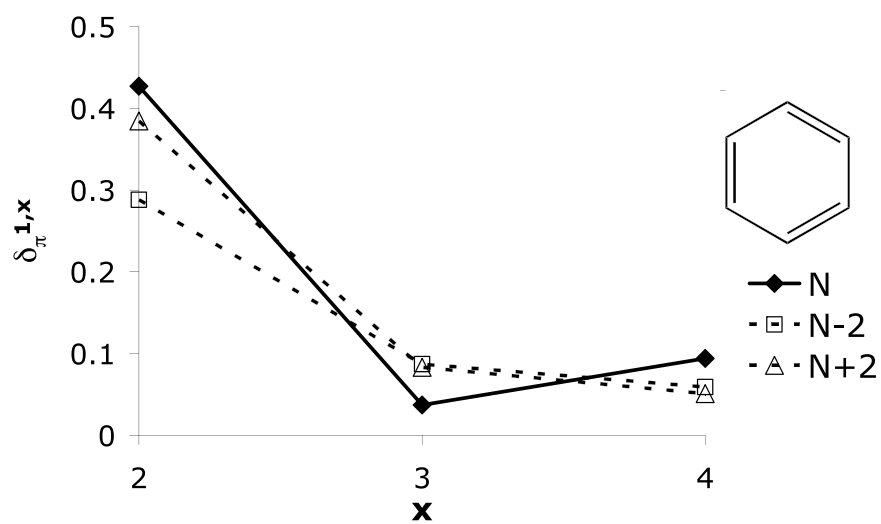



c)

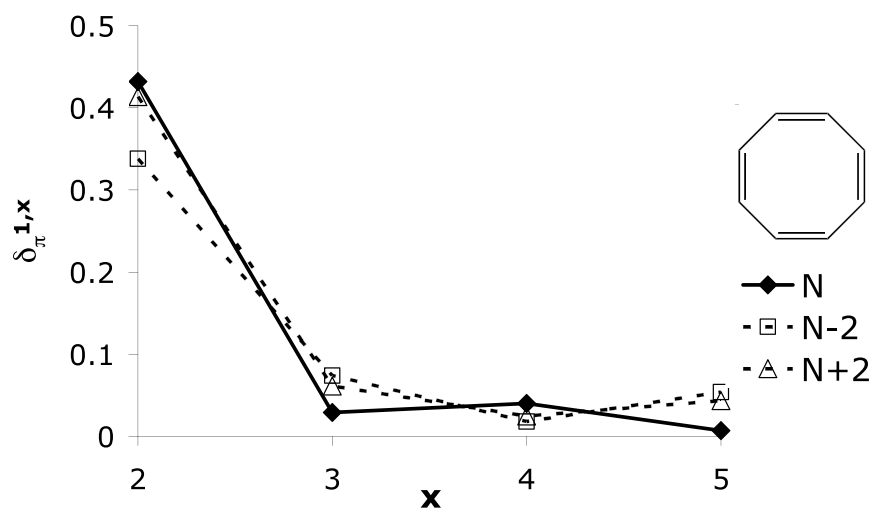

d)

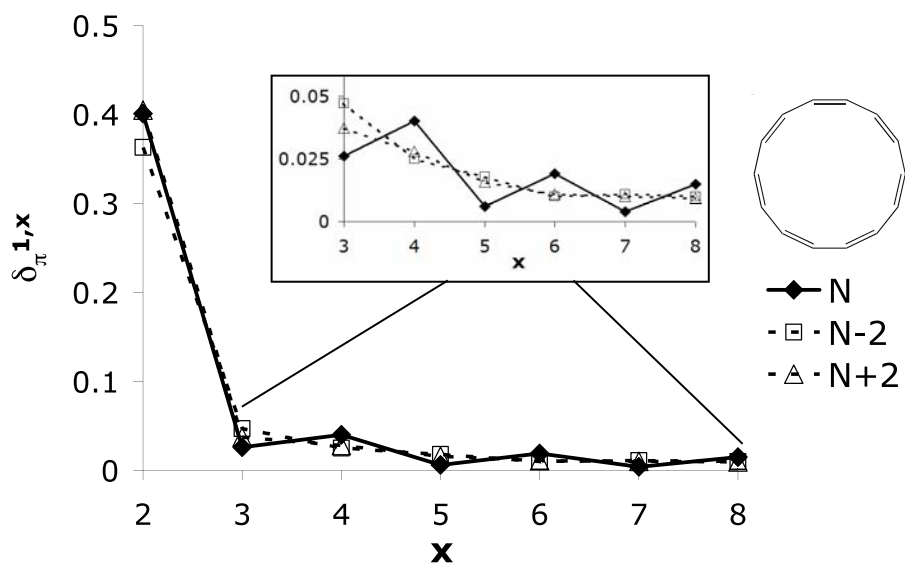

e)

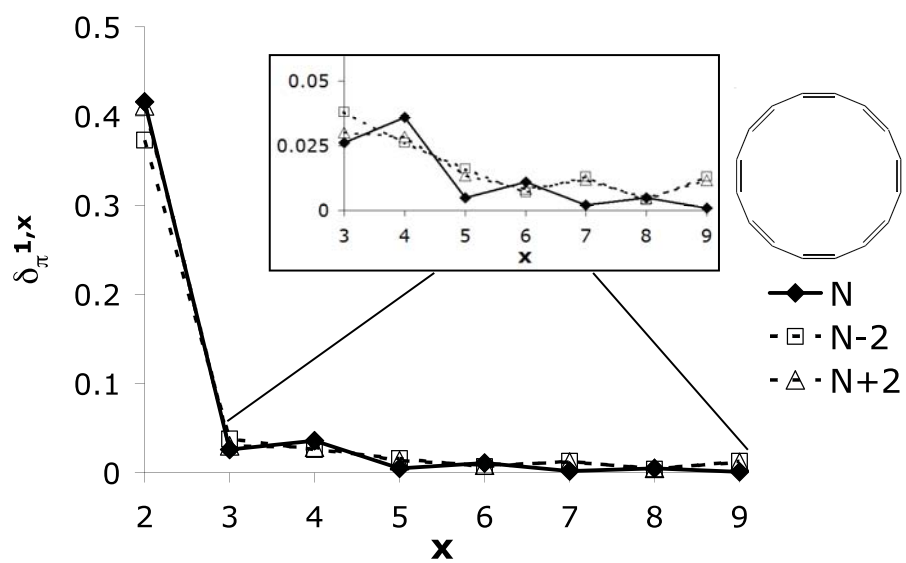

**Figure S4.** Evolution of  $\delta_{\pi}^{1,x}$  (in electrons) in N and N-2 species for a)  $C_{10}H_{10}$ , b)  $C_{12}H_{12}$ , c)  $C_{11}H_{11}^+$ , d)  $C_{11}H_{11}^-$ , e)  $C_{13}H_{13}^+$ , f)  $C_{13}H_{13}^-$ , and g)  $C_{15}H_{15}^+$ .

a)

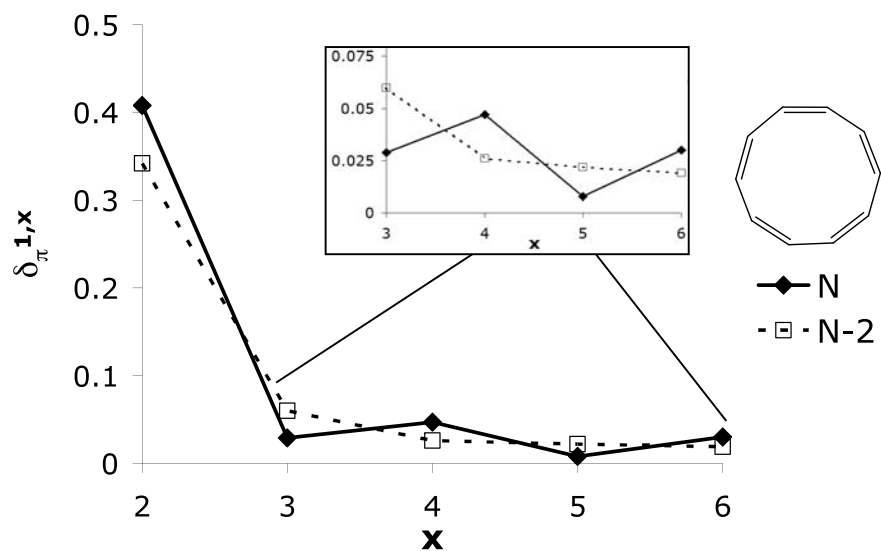

b)

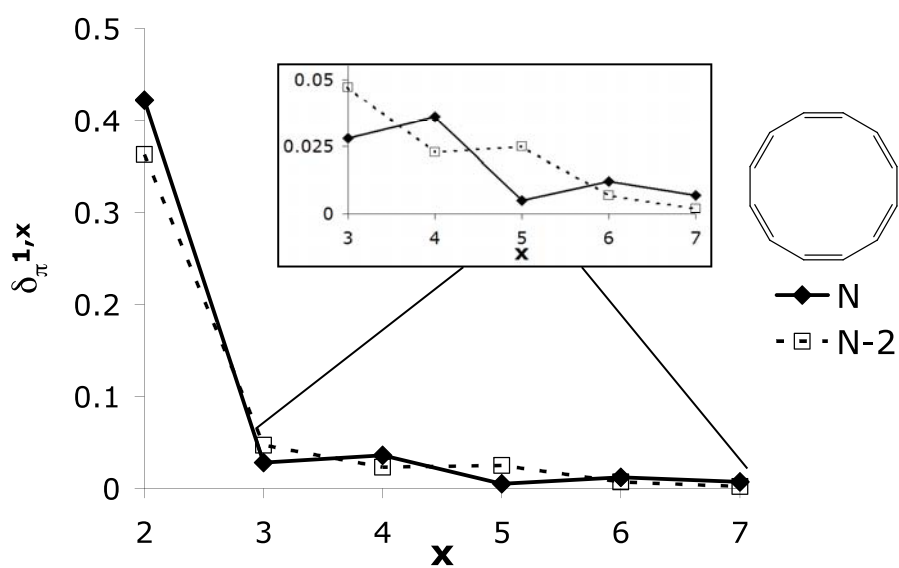

c)

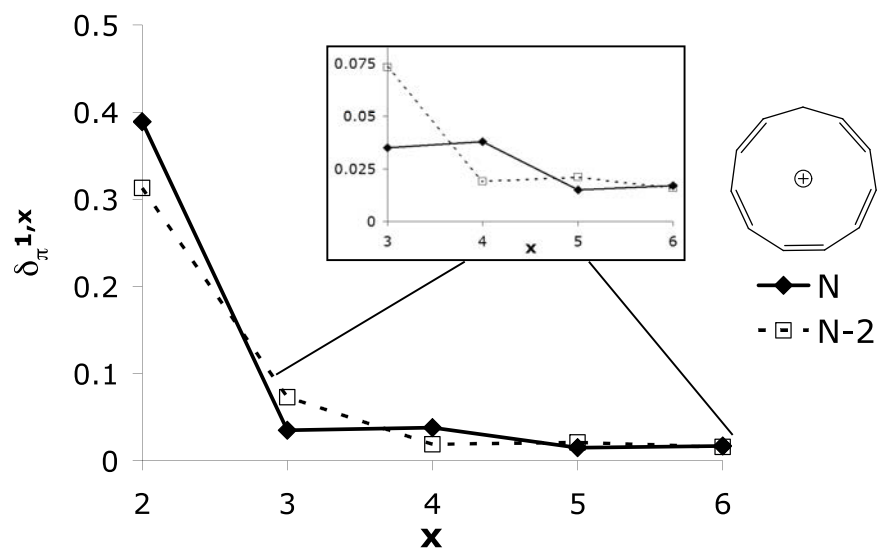

d)

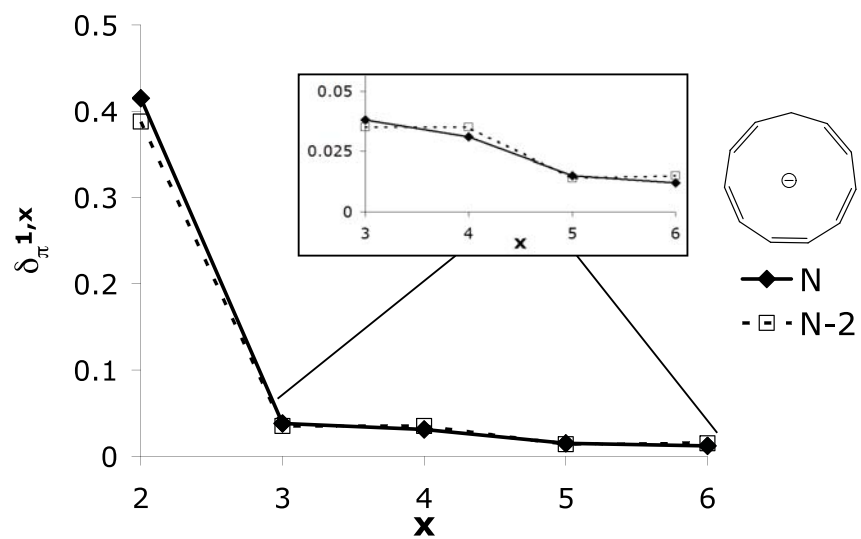

e)

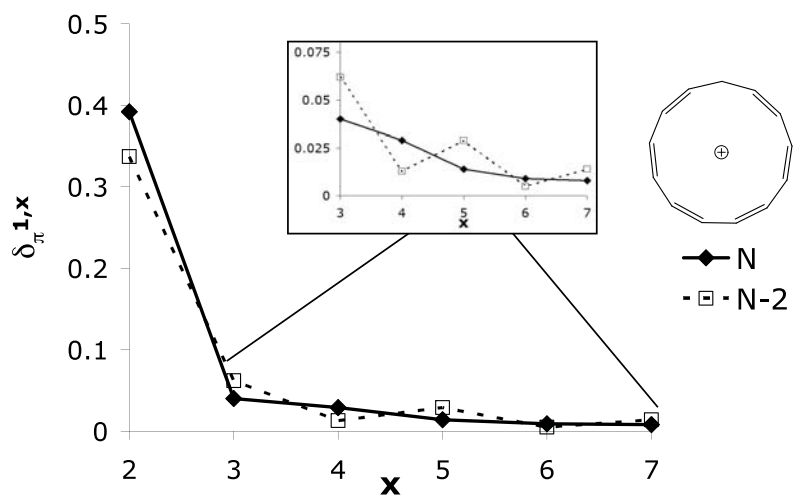

f)

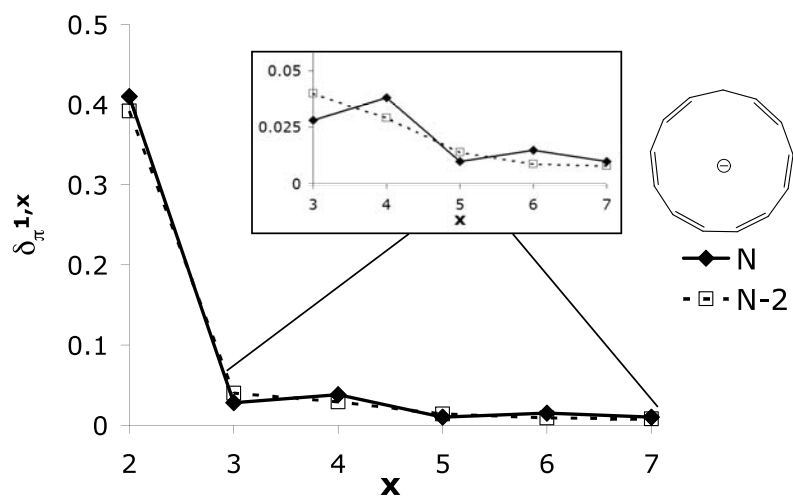

g)

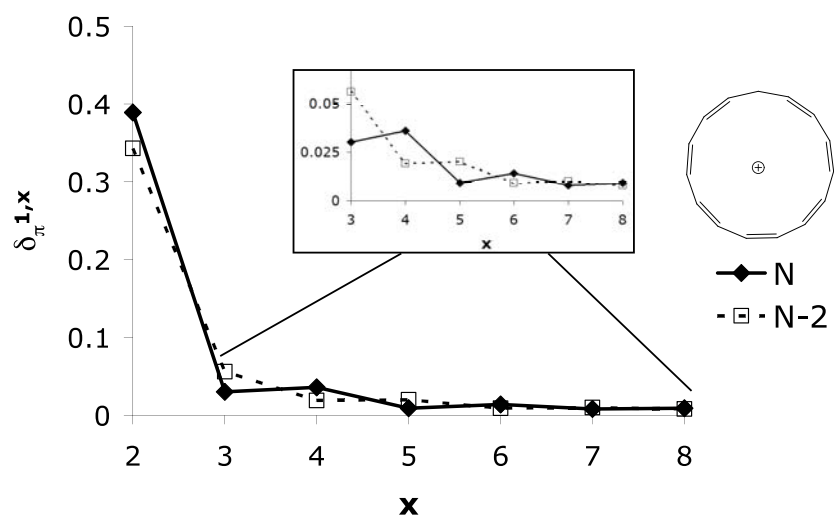

**Table S5.**  $\delta_{\pi}^{1,x}$  (in electrons), MCI, FLU, HOMA, NICS(0), NICS(1), NICS(0)<sub>zz</sub>, and NICS(1)<sub>zz</sub> results for the rings studied at the lowest-lying singlet and triplet states for a) C<sub>6</sub>H<sub>5</sub>N, b) pyridazine, c) pyrimidine, d) triazine, and e) C<sub>7</sub>H<sub>7</sub><sup>+</sup>. Figures show the evolution of  $\delta_{\pi}^{1,x}$  (in electrons) in N(s) and N(t) species.

|                                            |             | $\delta_{\pi}^{1,2}$ | $\delta_{\pi}^{1,3}$ | $\delta_{\pi}^{1,4}$ | MCI        | FLU   | HOMA  | NICS(0) | NICS(1) | NICS(0) <sub>zz</sub> | NICS(1) <sub>zz</sub> |
|--------------------------------------------|-------------|----------------------|----------------------|----------------------|------------|-------|-------|---------|---------|-----------------------|-----------------------|
| C <sub>6</sub> H <sub>5</sub> N            | <i>N(s)</i> | 0.422                | 0.040                | 0.093                | 0.069      | 0.001 | 1.00  | -7.46   | -10.91  | -13.21                | -28.72                |
|                                            | <i>N(t)</i> | 0.332                | 0.086                | 0.054                | -<br>0.009 | 0.006 | 0.76  | 13.38   | 12.20   | 74.82                 | 45.84                 |
| pyridazine                                 | <i>N(s)</i> | 0.423                | 0.041                | 0.094                | 0.070      | 0.003 | 0.98  | -5.65   | -11.09  | -11.52                | -28.33                |
|                                            | <i>N(t)</i> | 0.329                | 0.073                | 0.027                | -<br>0.002 | 0.035 | -0.53 | 19.16   | 15.77   | 85.24                 | 52.67                 |
| pyrimidine                                 | <i>N(s)</i> | 0.415                | 0.041                | 0.091                | 0.066      | 0.001 | 1.00  | -6.03   | -10.55  | -11.05                | -27.59                |
|                                            | <i>N(t)</i> | 0.328                | 0.084                | 0.047                | -<br>0.008 | 0.011 | 0.79  | 22.35   | 18.96   | 100.79                | 62.14                 |
| triazine                                   | <i>N(s)</i> | 0.410                | 0.039                | 0.087                | 0.064      | 0.003 | 1.00  | -4.48   | -10.10  | -7.87                 | -25.92                |
|                                            | <i>N(t)</i> | 0.329                | 0.075                | 0.029                | 0.003      | 0.032 | 0.24  | 49.23   | 33.94   | 179.78                | 107.18                |
| C <sub>7</sub> H <sub>7</sub> <sup>+</sup> | <i>N(s)</i> | 0.389                | 0.050                | 0.050                | 0.058      | 0.000 | 0.98  | -6.39   | -9.88   | -16.29                | -26.55                |
|                                            | <i>N(t)</i> | 0.329                | 0.073                | 0.034                | -<br>0.009 | 0.025 | 0.26  | 79.69   | 62.06   | 245.04                | 190.04                |

a)

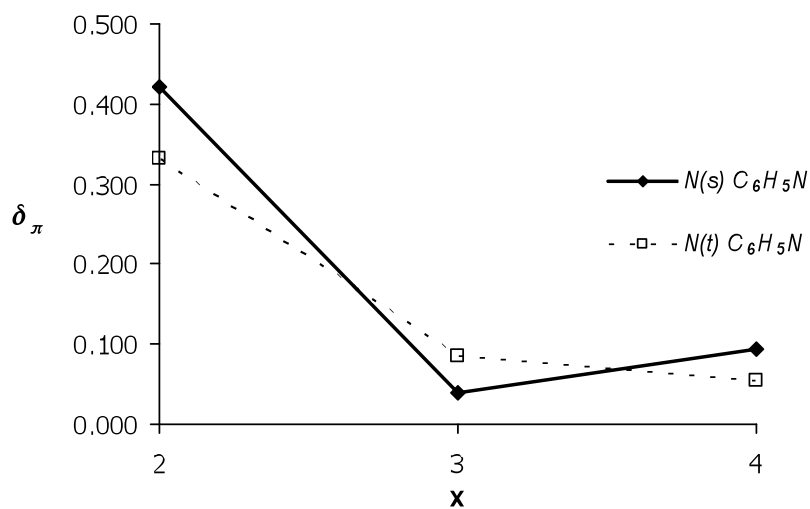

b)

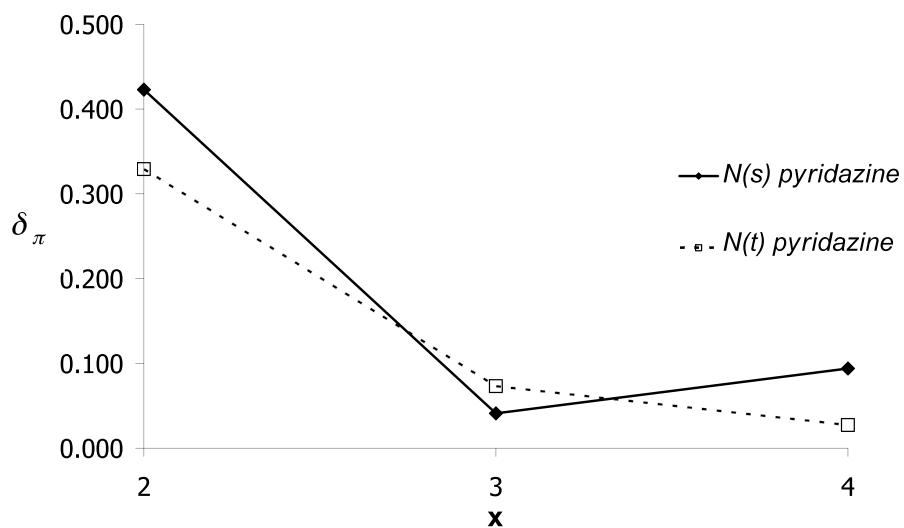

c)

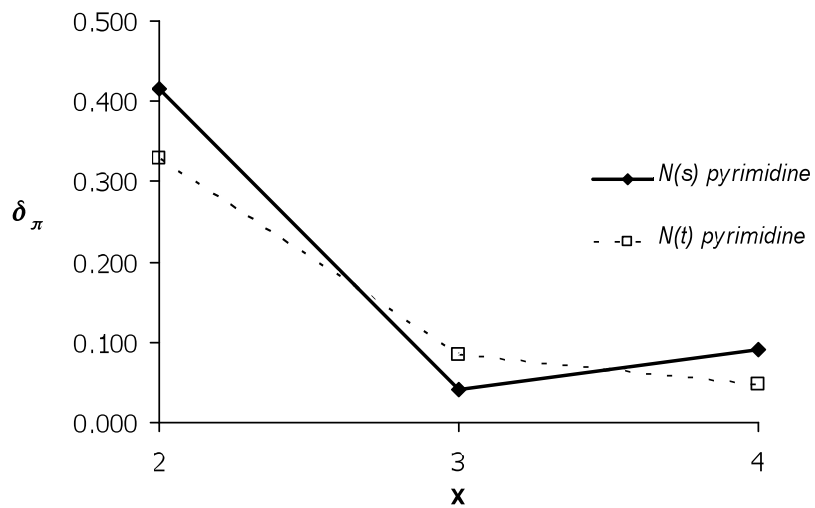

d)

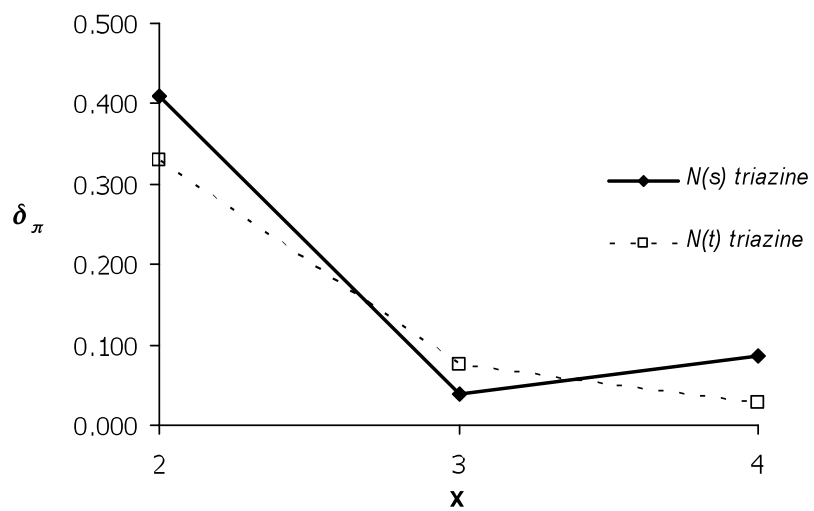

e)

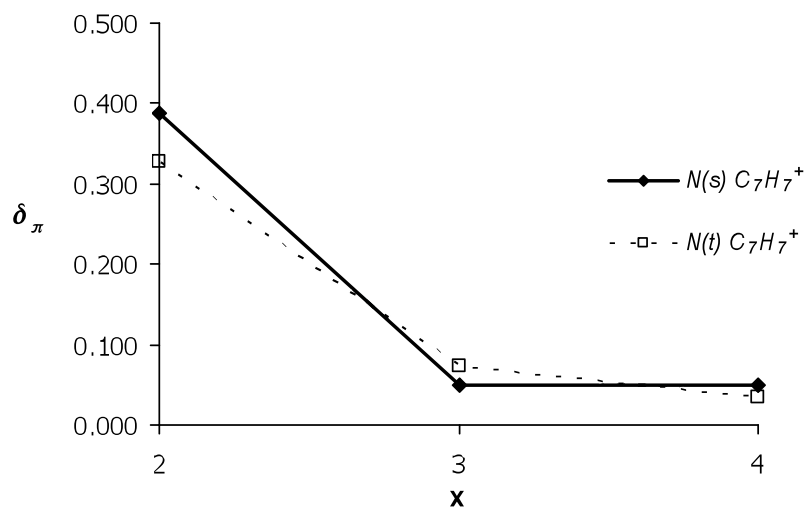



**Table S6.**  $\delta_{\pi}^{1,x}$  (in electrons), MCI, FLU, HOMA, NICS(0), NICS(1), NICS(0)<sub>zz</sub>, and NICS(1)<sub>zz</sub> results for the rings studied at the lowest-lying singlet and triplet states for a) C<sub>4</sub>H<sub>4</sub>, b) C<sub>5</sub>H<sub>5</sub><sup>-</sup>, c) C<sub>5</sub>H<sub>4</sub>NH, d) C<sub>5</sub>H<sub>4</sub>O, e) C<sub>5</sub>H<sub>4</sub>S<sup>+</sup>, f) C<sub>5</sub>H<sub>4</sub>P<sup>-</sup>, g) C<sub>5</sub>H<sub>4</sub>BH, h) C<sub>5</sub>H<sub>4</sub>SiH<sup>+</sup>, and i) C<sub>5</sub>H<sub>4</sub>F<sub>2</sub>. Figures show the evolution of  $\delta_{\pi}^{1,x}$  (in electrons) in N(s) and N(t) species.

|                                                |             | $\delta_{\pi}^{(1-2)}$ | $\delta_{\pi}^{(1-3)}$ | MCI   | FLU   | HOMA  | NICS(0) | NICS(1) | NICS(0) <sub>zz</sub> | NICS(1) <sub>zz</sub> |
|------------------------------------------------|-------------|------------------------|------------------------|-------|-------|-------|---------|---------|-----------------------|-----------------------|
| C <sub>4</sub> H <sub>4</sub>                  | <i>N(s)</i> | 0.477                  | 0.059                  | 0.009 | 0.211 | -4.10 | 25.35   | 16.45   | 109.39                | 55.50                 |
|                                                | <i>N(t)</i> | 0.375                  | 0.233                  | 0.063 | 0.012 | 0.32  | -3.10   | -7.95   | 22.16                 | -17.03                |
| C <sub>5</sub> H <sub>5</sub> <sup>-</sup>     | <i>N(s)</i> | 0.436                  | 0.085                  | 0.072 | 0.000 | 0.84  | -15.61  | -12.29  | -15.93                | -33.42                |
|                                                | <i>N(t)</i> | 0.389                  | 0.084                  | 0.014 | 0.019 | 0.36  | 14.90   | 9.84    | 64.94                 | 37.64                 |
| C <sub>5</sub> H <sub>4</sub> NH               | <i>N(s)</i> | 0.417                  | 0.086                  | 0.050 | 0.008 | 0.86  | -14.74  | -11.10  | -12.31                | -30.96                |
|                                                | <i>N(t)</i> | 0.314                  | 0.068                  | 0.001 | 0.039 | -0.18 | 13.00   | 11.26   | 68.88                 | 36.30                 |
| C <sub>5</sub> H <sub>4</sub> O                | <i>N(s)</i> | 0.407                  | 0.081                  | 0.029 | 0.017 | 0.21  | -12.68  | -10.26  | -8.80                 | -27.23                |
|                                                | <i>N(t)</i> | 0.300                  | 0.070                  | 0.002 | 0.035 | -0.97 | 6.62    | 5.37    | 48.74                 | 19.66                 |
| C <sub>5</sub> H <sub>4</sub> S                | <i>N(s)</i> | 0.417                  | 0.082                  | 0.041 | 0.017 | 0.82  | -13.86  | -11.27  | -9.22                 | -28.06                |
|                                                | <i>N(t)</i> | 0.304                  | 0.072                  | 0.000 | 0.058 | -1.08 | 7.16    | 6.65    | 50.63                 | 25.14                 |
| C <sub>5</sub> H <sub>4</sub> P <sup>-</sup>   | <i>N(s)</i> | 0.440                  | 0.088                  | 0.068 | *     | *     | -14.54  | -11.80  | -14.98                | -31.56                |
|                                                | <i>N(t)</i> | 0.345                  | 0.080                  | 0.002 | *     | *     | 40.15   | 36.87   | 140.23                | 111.26                |
| C <sub>5</sub> H <sub>4</sub> BH               | <i>N(s)</i> | 0.361                  | 0.053                  | 0.003 | *     | *     | 19.89   | 11.45   | 64.77                 | 38.23                 |
|                                                | <i>N(t)</i> | 0.256                  | 0.104                  | 0.015 | *     | *     | -0.15   | -7.88   | 0.42                  | -20.36                |
| C <sub>5</sub> H <sub>4</sub> SiH <sup>+</sup> | <i>N(s)</i> | 0.359                  | 0.065                  | 0.006 | *     | *     | 15.74   | 10.59   | 57.75                 | 37.40                 |
|                                                | <i>N(t)</i> | 0.281                  | 0.108                  | 0.025 | *     | *     | -3.59   | -8.54   | -3.12                 | -20.27                |
| C <sub>5</sub> H <sub>4</sub> F <sub>2</sub>   | <i>N(s)</i> | 0.358                  | 0.043                  | 0.005 | *     | *     | 3.09    | 0.10    | 29.61                 | 7.22                  |
|                                                | <i>N(t)</i> | 0.244                  | 0.078                  | 0.010 | *     | *     | -2.08   | -5.14   | 13.26                 | -8.47                 |

a)

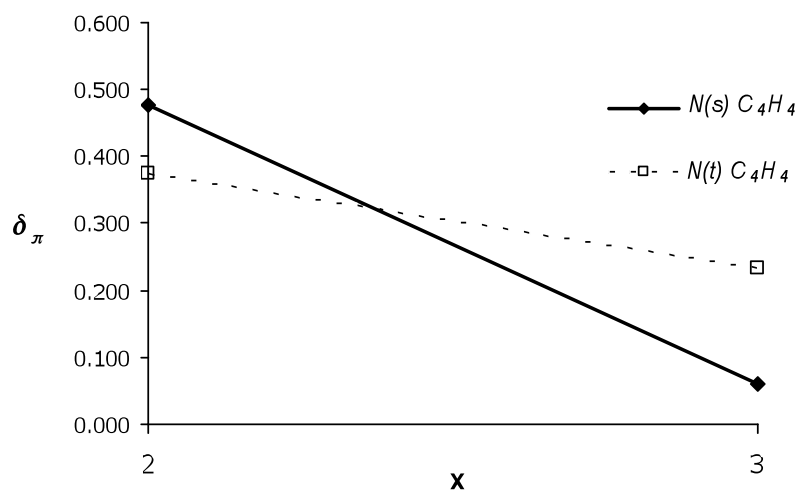

b)

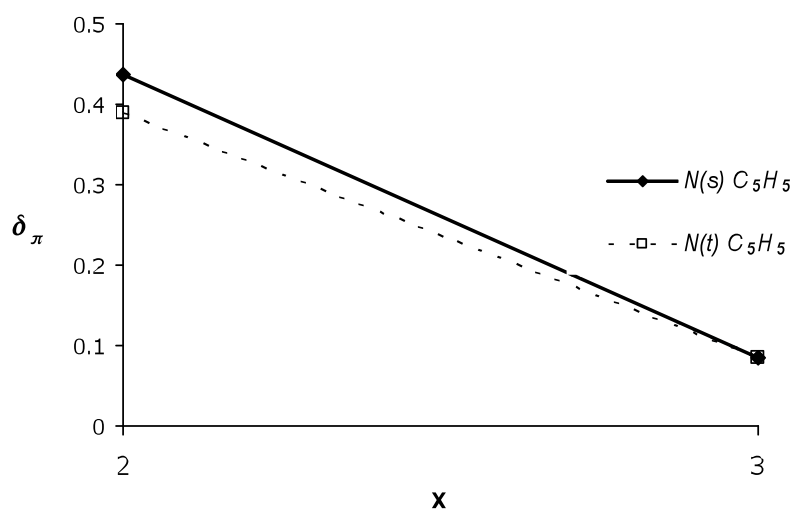

c)

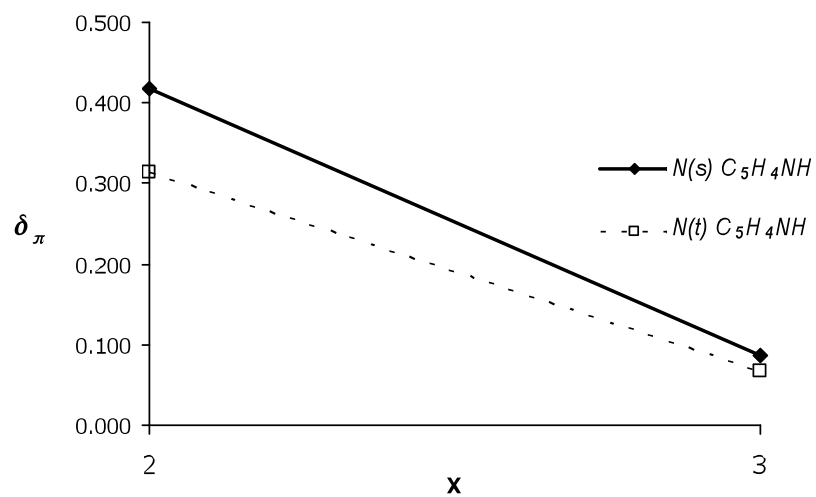

d)

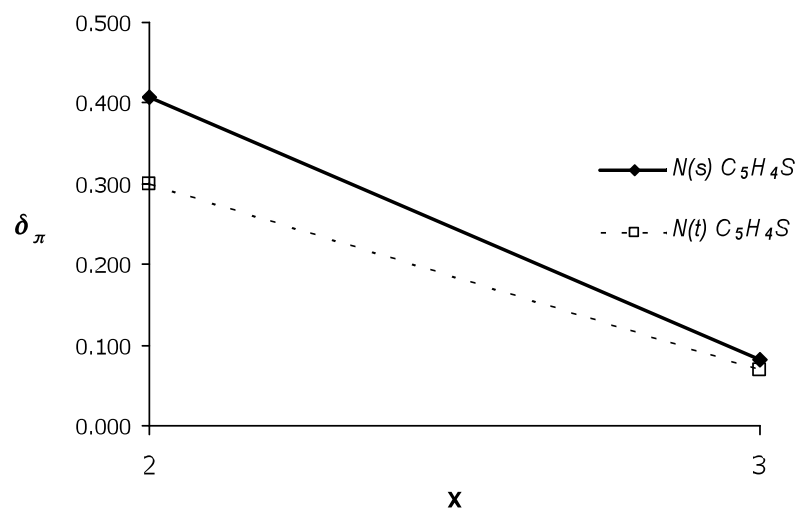

e)

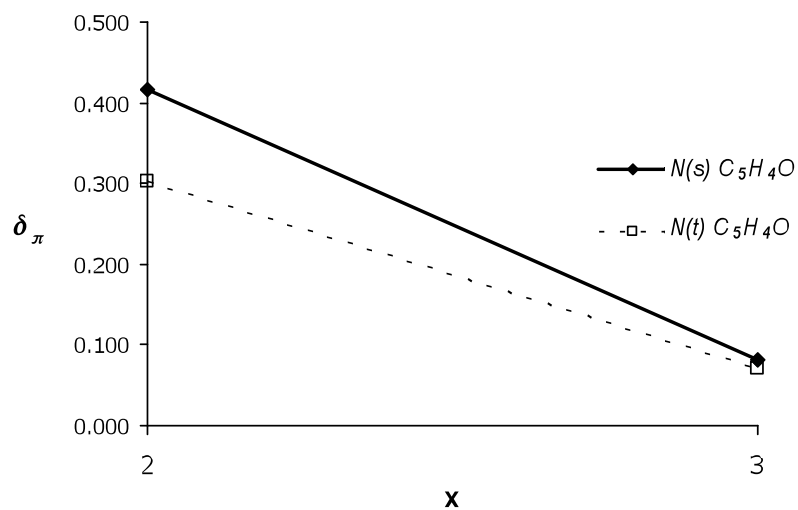

f)

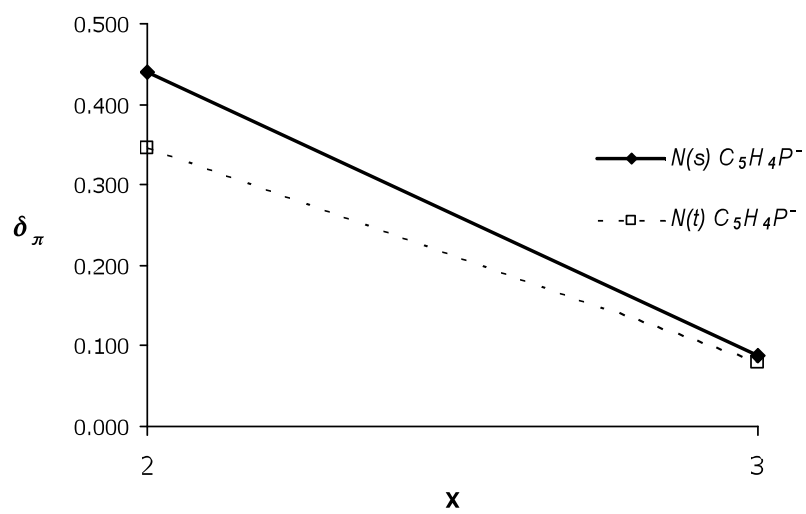

g)

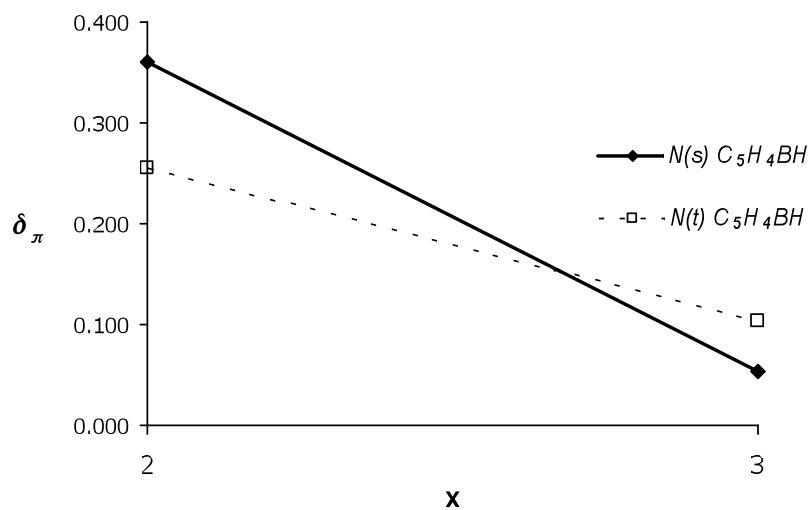

h)

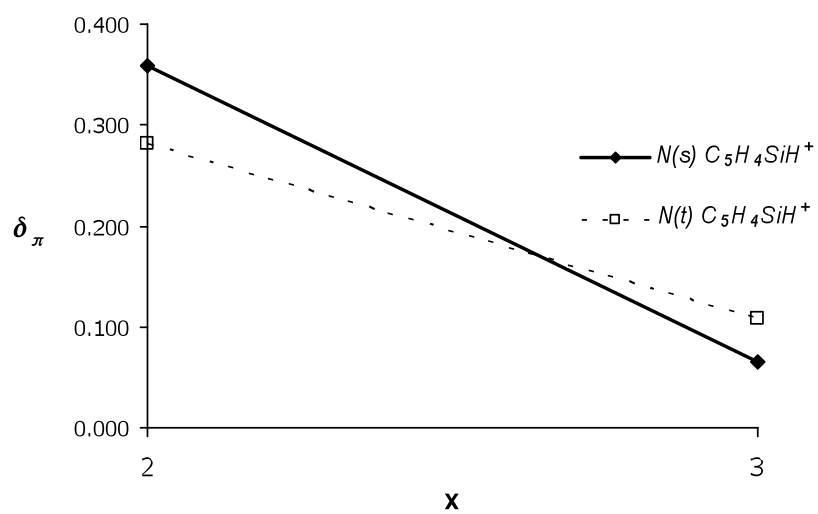

i)

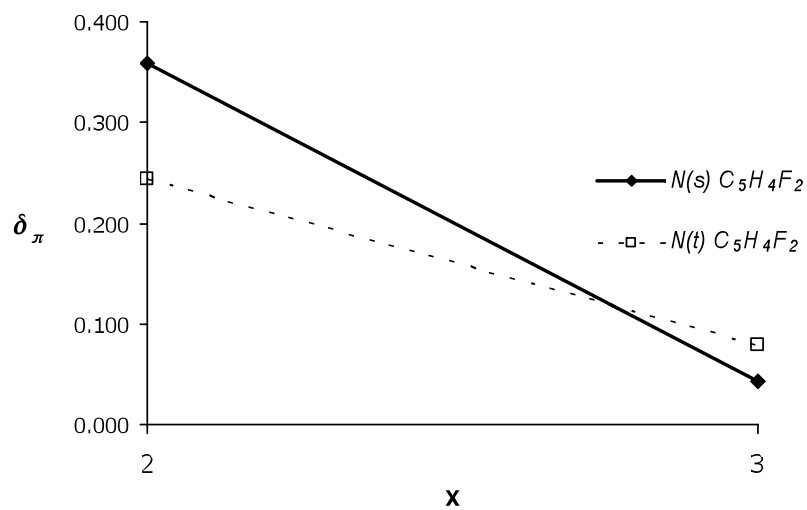

**Table S7.** MCI, FLU, HOMA, NICS(0), NICS(1), NICS(0)<sub>zz</sub>, and NICS(1)<sub>zz</sub> results for the rings studied. *A* and *B* refer to the different rings in the PAH (see Schemes 2 and 3).

A) MCI, FLU, and HOMA

|                                                | MCI         |          |             | FLU         |          |             | HOMA        |          |             |
|------------------------------------------------|-------------|----------|-------------|-------------|----------|-------------|-------------|----------|-------------|
|                                                | <i>N</i> -2 | <i>N</i> | <i>N</i> +2 | <i>N</i> -2 | <i>N</i> | <i>N</i> +2 | <i>N</i> -2 | <i>N</i> | <i>N</i> +2 |
| C <sub>6</sub> H <sub>6</sub>                  | -0.020      | 0.073    | 0.002       | 0.044       | 0.000    | 0.038       | -0.953      | 0.991    | -1.079      |
| C <sub>5</sub> H <sub>5</sub> N                | -0.010      | 0.069    | 0.004       | 0.056       | 0.001    | 0.044       | -1.340      | 0.996    | -0.073      |
| pyridazine                                     | 0.000       | 0.070    | 0.002       | 0.109       | 0.003    | 0.024       | -0.294      | 0.979    | -1.179      |
| pyrimidine                                     | 0.001       | 0.066    | 0.002       | 0.106       | 0.001    | 0.039       | -0.641      | 0.999    | 0.114       |
| pyrazine                                       | 0.006       | 0.066    | 0.003       | 0.077       | 0.003    | 0.044       | -1.934      | 0.996    | 0.383       |
| triazine                                       | -0.016      | 0.064    | 0.002       | 0.031       | 0.003    | 0.052       | 0.934       | 1.000    | 0.086       |
| C <sub>7</sub> H <sub>7</sub> <sup>+</sup>     | -0.005      | 0.058    | -0.017      | 0.052       | 0.000    | 0.038       | -1.058      | 0.984    | 0.015       |
| C <sub>4</sub> H <sub>4</sub>                  | 0.183       | 0.009    | 0.064       | 0.033       | 0.211    | 0.017       | 0.138       | -4.101   | -0.718      |
| C <sub>8</sub> H <sub>8</sub>                  | 0.040       | -0.001   | 0.014       | 0.009       | 0.105    | 0.006       | 0.896       | -0.241   | 0.810       |
| C <sub>5</sub> H <sub>5</sub> <sup>-</sup>     | -0.028      | 0.072    | 0.010       | 0.054       | 0.000    | 0.036       | -1.173      | 0.837    | -6.476      |
| C <sub>4</sub> H <sub>4</sub> NH               | -0.014      | 0.050    | 0.011       | 0.074       | 0.008    | 0.017       | -0.207      | 0.860    | -1.036      |
| C <sub>4</sub> H <sub>4</sub> O                | -0.010      | 0.029    | 0.013       | 0.081       | 0.017    | 0.021       | -0.221      | 0.206    | -0.011      |
| C <sub>4</sub> H <sub>4</sub> S                | -0.021      | 0.041    | 0.014       | 0.034       | 0.017    | 0.040       | 0.131       | 0.819    | -1.774      |
| C <sub>4</sub> H <sub>4</sub> P <sup>-</sup>   | -0.019      | 0.068    | 0.014       | a           | a        | a           | a           | a        | a           |
| C <sub>4</sub> H <sub>4</sub> BH               | 0.022       | -0.003   | 0.040       | a           | a        | a           | a           | a        | a           |
| C <sub>4</sub> H <sub>4</sub> SiH <sup>+</sup> | 0.037       | -0.006   | 0.057       | a           | a        | a           | a           | a        | a           |
| C <sub>4</sub> H <sub>4</sub> F <sub>2</sub>   | 0.017       | -0.005   | 0.023       | a           | a        | a           | a           | a        | a           |
| naphthalene                                    | 0.020       | 0.039    | 0.018       | 0.028       | 0.018    | 0.025       | 0.667       | 0.785    | 0.302       |
| quinoline <sup>A</sup>                         | 0.021       | 0.037    | 0.016       | 0.036       | 0.023    | 0.031       | 0.749       | 0.823    | 0.377       |
| quinoline <sup>B</sup>                         | 0.008       | 0.038    | 0.020       | 0.054       | 0.022    | 0.027       | 0.318       | 0.796    | 0.334       |
| anthracene <sup>A</sup>                        | 0.028       | 0.029    | 0.025       | 0.016       | 0.031    | 0.016       | 0.813       | 0.630    | 0.618       |
| anthracene <sup>B</sup>                        | 0.013       | 0.027    | 0.012       | 0.031       | 0.018    | 0.030       | 0.673       | 0.723    | 0.351       |
| phenanthrene <sup>A</sup>                      | 0.019       | 0.047    | 0.020       | 0.030       | 0.010    | 0.029       | 0.603       | 0.870    | 0.335       |
| phenanthrene <sup>B</sup>                      | 0.010       | 0.018    | 0.008       | 0.050       | 0.038    | 0.053       | 0.197       | 0.461    | -0.464      |
| biphenylene <sup>A</sup>                       | 0.008       | 0.056    | 0.010       | 0.035       | 0.011    | 0.032       | 0.412       | 0.845    | 0.033       |
| biphenylene <sup>B</sup>                       | 0.054       | 0.021    | 0.016       | 0.087       | 0.089    | 0.089       | -0.448      | -1.035   | -1.590      |
| acenaphthene <sup>A</sup>                      | 0.005       | 0.011    | 0.034       | 0.084       | 0.094    | 0.020       | -0.408      | 0.152    | 0.529       |
| acenaphthene <sup>B</sup>                      | 0.014       | 0.038    | 0.019       | 0.036       | 0.021    | 0.024       | 0.582       | 0.848    | 0.568       |
| pyracylene <sup>A</sup>                        | 0.015       | 0.032    | 0.019       | 0.042       | 0.021    | 0.027       | 0.463       | 0.761    | 0.633       |
| pyracylene <sup>B</sup>                        | 0.017       | 0.012    | 0.030       | 0.052       | 0.081    | 0.022       | 0.528       | -0.168   | 0.582       |
| C <sub>6</sub> H <sub>6</sub> (t)              | 0.079       | -0.002   | 0.036       | 0.012       | 0.025    | 0.006       | 0.392       | -0.537   | 0.476       |
| C <sub>8</sub> H <sub>8</sub> (t)              | -0.002      | 0.028    | 0.007       | 0.029       | 0.002    | 0.012       | -0.046      | 0.890    | 0.612       |

<sup>a</sup> There are no reference parameters for the P-C, B-C, Si-C and F-C bonds.

B) NICS(0) and NICS(1)

|                                                | NICS(0)      |          |              | NICS(1)      |          |              |
|------------------------------------------------|--------------|----------|--------------|--------------|----------|--------------|
|                                                | <i>N</i> -2  | <i>N</i> | <i>N</i> +2  | <i>N</i> -2  | <i>N</i> | <i>N</i> +2  |
| C <sub>6</sub> H <sub>6</sub>                  | 80.46        | -8.89    | 113.25       | 60.07        | -11.13   | 93.76        |
| C <sub>5</sub> H <sub>5</sub> N                | 34.53        | -7.46    | 111.48       | 17.82        | -10.91   | 91.61        |
| pyridazine                                     | <sup>b</sup> | -5.65    | 37.55        | <sup>b</sup> | -11.09   | 30.24        |
| pyrimidine                                     | <sup>b</sup> | -6.03    | 57.94        | <sup>b</sup> | -10.55   | 45.74        |
| pyrazine                                       | 22.51        | -5.87    | 72.14        | 7.07         | -10.93   | 57.36        |
| triazine                                       | 29.13        | -4.48    | 75.32        | 13.18        | -10.10   | 57.63        |
| C <sub>7</sub> H <sub>7</sub> <sup>+</sup>     | 317.72       | -6.39    | 159.84       | 265.21       | -9.88    | 130.72       |
| C <sub>4</sub> H <sub>4</sub>                  | 15.58        | 25.35    | -22.46       | -8.58        | 16.45    | -8.95        |
| C <sub>8</sub> H <sub>8</sub>                  | -6.70        | 40.20    | -16.58       | -9.15        | 31.74    | -13.87       |
| C <sub>5</sub> H <sub>5</sub> <sup>-</sup>     | 111.03       | -15.61   | <sup>b</sup> | 85.97        | -12.29   | <sup>b</sup> |
| C <sub>4</sub> H <sub>4</sub> NH               | 58.25        | -14.74   | <sup>b</sup> | 39.06        | -11.10   | <sup>b</sup> |
| C <sub>4</sub> H <sub>4</sub> O                | 29.75        | -12.68   | 85.38        | 15.07        | -10.26   | 49.67        |
| C <sub>4</sub> H <sub>4</sub> S                | 26.52        | -13.86   | <sup>b</sup> | 15.62        | -11.27   | <sup>b</sup> |
| C <sub>4</sub> H <sub>4</sub> P <sup>-</sup>   | 62.26        | -14.54   | <sup>b</sup> | 45.79        | -11.80   | <sup>b</sup> |
| C <sub>4</sub> H <sub>4</sub> BH               | 14.10        | 19.89    | -13.96       | -5.98        | 11.45    | -9.39        |
| C <sub>4</sub> H <sub>4</sub> SiH <sup>+</sup> | 10.22        | 15.74    | -15.00       | -5.23        | 10.59    | -10.05       |
| C <sub>4</sub> H <sub>4</sub> F <sub>2</sub>   | 10.46        | 3.09     | -11.96       | -3.99        | 0.10     | -6.22        |
| naphthalene                                    | 25.98        | -8.91    | 43.42        | 16.06        | -11.26   | 34.74        |
| quinoline <sup>A</sup>                         | 31.87        | -7.94    | 40.74        | 20.82        | -11.17   | 31.11        |
| quinoline <sup>B</sup>                         | 48.08        | -9.28    | 32.25        | 32.43        | -11.51   | 25.43        |
| anthracene <sup>A</sup>                        | 10.94        | -8.09    | 16.12        | 4.13         | -10.53   | 11.38        |
| anthracene <sup>B</sup>                        | 16.41        | -11.91   | 19.35        | 9.20         | -13.77   | 13.05        |
| phenanthrene <sup>A</sup>                      | 26.75        | -9.21    | 52.88        | 17.62        | -11.48   | 41.48        |
| phenanthrene <sup>B</sup>                      | 23.64        | -6.16    | 39.56        | 15.61        | -9.08    | 29.79        |
| biphenylene <sup>A</sup>                       | -3.81        | -3.09    | -11.04       | -8.69        | -5.48    | -10.05       |
| biphenylene <sup>B</sup>                       | -1.74        | 18.73    | -19.07       | -12.66       | 8.76     | -18.63       |
| acenaphthene <sup>A</sup>                      | 44.07        | 3.82     | -17.18       | 2.38         | -0.63    | -15.49       |
| acenaphthene <sup>B</sup>                      | 29.65        | -7.23    | 6.58         | -3.20        | -9.62    | 3.24         |
| pyracylene <sup>A</sup>                        | -10.77       | 0.47     | -4.88        | -13.94       | -2.79    | -7.03        |
| pyracylene <sup>B</sup>                        | -7.71        | 16.85    | -19.03       | -14.21       | 10.31    | -17.55       |
| C <sub>6</sub> H <sub>6</sub> (t)              | -0.2322      | 28.7187  | <sup>b</sup> | -8.4744      | 20.6024  | <sup>b</sup> |
| C <sub>8</sub> H <sub>8</sub> (t)              | 38.4236      | -11.6512 | 29.0993      | 29.2637      | -11.5248 | 24.2375      |

<sup>b</sup> NICS values could not be calculated at the correct state with *N*-2 or *N*+2  $\pi$  electrons.

C) NICS(0)<sub>zz</sub> and NICS(1)<sub>zz</sub>



|                                                | NICS(0)zz    |          |              | NICS(1)zz    |          |              |
|------------------------------------------------|--------------|----------|--------------|--------------|----------|--------------|
|                                                | <i>N</i> -2  | <i>N</i> | <i>N</i> +2  | <i>N</i> -2  | <i>N</i> | <i>N</i> +2  |
| C <sub>6</sub> H <sub>6</sub>                  | 240.14       | -14.50   | 354.40       | 186.03       | -29.33   | 281.33       |
| C <sub>5</sub> H <sub>5</sub> N                | 92.51        | -13.21   | 357.03       | 58.41        | -28.72   | 276.60       |
| pyridazine                                     | <sup>b</sup> | -11.52   | 133.96       | <sup>b</sup> | -28.33   | 93.48        |
| pyrimidine                                     | <sup>b</sup> | -11.05   | 191.60       | <sup>b</sup> | -27.59   | 138.29       |
| pyrazine                                       | 57.66        | -12.65   | 235.77       | 27.43        | -28.51   | 174.10       |
| triazine                                       | 130.77       | -7.87    | 243.99       | 49.09        | -25.92   | 173.55       |
| C <sub>7</sub> H <sub>7</sub> <sup>+</sup>     | 956.32       | -16.29   | 491.14       | 801.96       | -26.55   | 394.63       |
| C <sub>4</sub> H <sub>4</sub>                  | 33.96        | 109.39   | 5.51         | -11.34       | 55.50    | -23.41       |
| C <sub>8</sub> H <sub>8</sub>                  | -20.04       | 126.99   | -39.56       | -25.38       | 97.63    | -39.63       |
| C <sub>5</sub> H <sub>5</sub> <sup>-</sup>     | 334.40       | -15.93   | <sup>b</sup> | 264.04       | -33.42   | <sup>b</sup> |
| C <sub>4</sub> H <sub>4</sub> NH               | 181.48       | -12.31   | <sup>b</sup> | 124.55       | -30.96   | <sup>b</sup> |
| C <sub>4</sub> H <sub>4</sub> O                | 95.58        | -8.80    | 60.94        | 54.11        | -27.23   | 33.12        |
| C <sub>4</sub> H <sub>4</sub> S                | 84.80        | -9.22    | <sup>b</sup> | 54.83        | -28.06   | <sup>b</sup> |
| C <sub>4</sub> H <sub>4</sub> P <sup>-</sup>   | 183.84       | -14.98   | <sup>b</sup> | 145.96       | -31.56   | <sup>b</sup> |
| C <sub>4</sub> H <sub>4</sub> BH               | 10.13        | 64.77    | -16.19       | -12.76       | 38.23    | -30.67       |
| C <sub>4</sub> H <sub>4</sub> SiH <sup>+</sup> | 6.53         | 57.75    | -15.45       | -11.56       | 37.40    | -29.42       |
| C <sub>4</sub> H <sub>4</sub> F <sub>2</sub>   | 19.45        | 29.61    | 0.76         | -3.28        | 7.22     | -15.78       |
| naphthalene                                    | 84.86        | -12.38   | 151.86       | 54.16        | -28.67   | 109.06       |
| quinoline <sup>A</sup>                         | 110.12       | -11.64   | 141.02       | 73.59        | -28.27   | 97.02        |
| quinoline <sup>B</sup>                         | 137.15       | -14.52   | 117.54       | 99.85        | -29.56   | 81.21        |
| anthracene <sup>A</sup>                        | 42.32        | -9.72    | 68.50        | 61.25        | -26.13   | 39.49        |
| anthracene <sup>B</sup>                        | 61.25        | -19.06   | 79.73        | 34.51        | -34.96   | 46.71        |
| phenanthrene <sup>A</sup>                      | 89.54        | -12.83   | 178.44       | 58.92        | -29.06   | 129.49       |
| phenanthrene <sup>B</sup>                      | 82.42        | -2.07    | 139.76       | 53.70        | -20.66   | 94.95        |
| biphenylene <sup>A</sup>                       | -4.62        | 4.97     | -14.02       | -20.30       | -11.66   | -26.21       |
| biphenylene <sup>B</sup>                       | 15.43        | 87.12    | -12.11       | -25.43       | 37.60    | -48.48       |
| acenaphthene <sup>A</sup>                      | 142.67       | 33.65    | -20.26       | 97.67        | 5.73     | -41.04       |
| acenaphthene <sup>B</sup>                      | 17.90        | -6.15    | 39.76        | -3.16        | -23.11   | 15.02        |
| pyracylene <sup>A</sup>                        | -18.10       | 18.44    | 5.02         | -34.63       | -1.98    | -15.03       |
| pyracylene <sup>B</sup>                        | -10.26       | 71.73    | -26.46       | -33.79       | 38.72    | -46.57       |
| C <sub>6</sub> H <sub>6</sub> (t)              | -1.5070      | 99.2615  | <sup>b</sup> | -19.6135     | 65.7673  | <sup>b</sup> |
| C <sub>8</sub> H <sub>8</sub> (t)              | 119.1554     | -29.3314 | 98.9257      | 91.2020      | -32.4397 | 76.6442      |

<sup>b</sup> NICS values cannot be calculated at the correct state with *N*-2 or *N*+2  $\pi$  electrons.
